# Supplementary material
Source: publisher site journal article supplement (https://www.dovepress.com/article/246009)
Supplement: Supplementary file 1 [file get_supplementary_file.php]

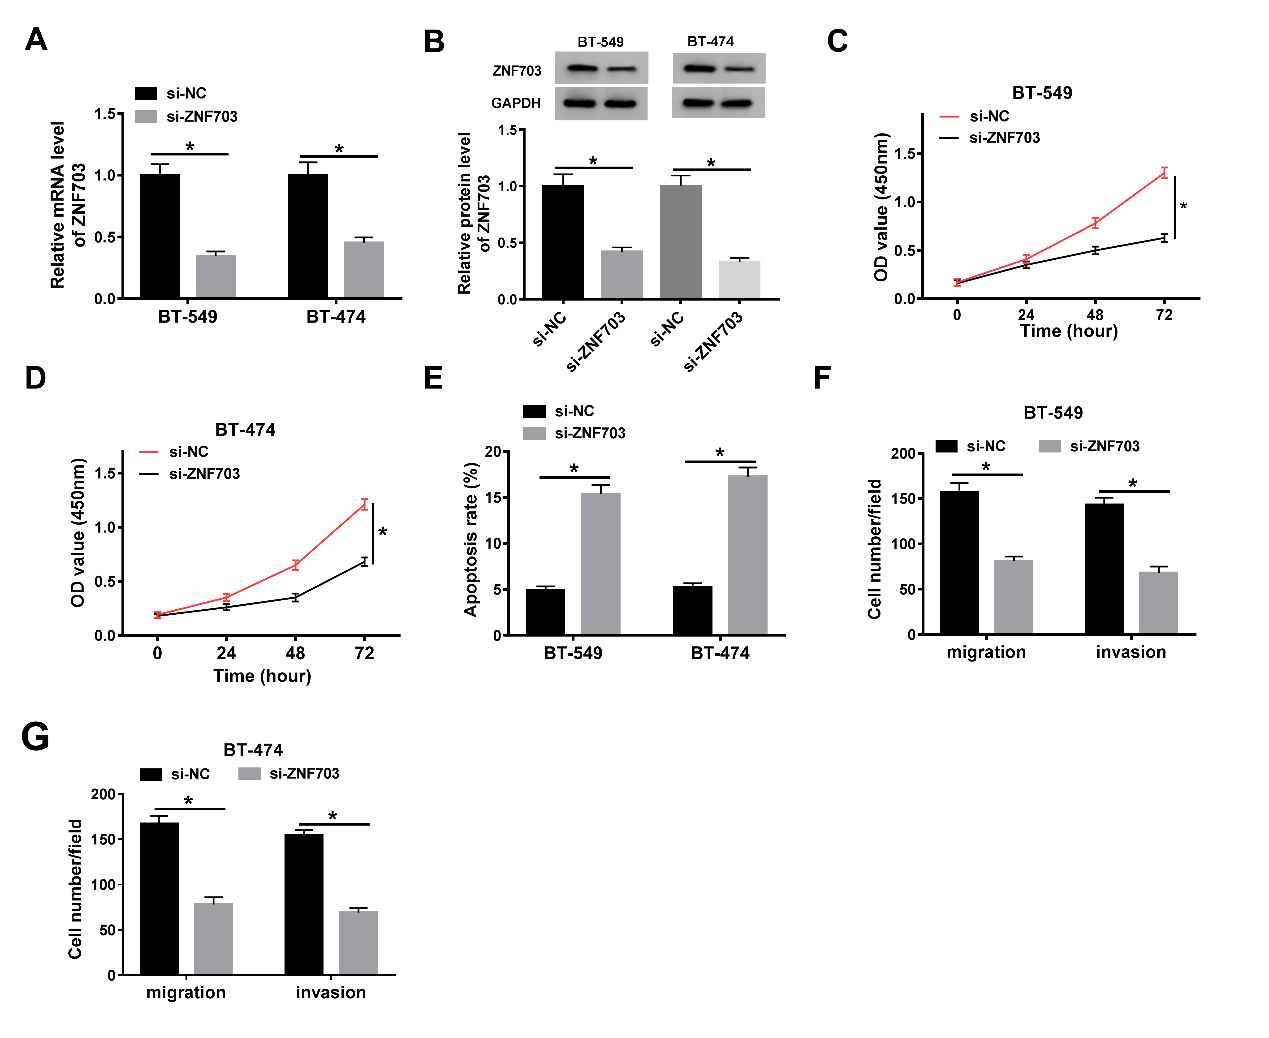


**Supplementary Figure 1 ZNF703 knockdown inhibited the progression of breast cancer cells.** (A and B) QRT-PCR and western blot assays were conducted to measure ZNF703 mRNA and protein levels in BT-549 and BT-474 cells transfected with si-NC or si- ZNF703. (C and D) CCK-8 assay was performed to assess the proliferation of transfected BT-549 and BT-474 cells. (E) Flow cytometry assay was carried out to evaluate the apoptosis of transfected BT-549 and BT-474 cells. (F and G) The migration and invasion of transfected BT-549 and BT-474 cells were examined by transwell assay. **P*<0.05.
